# Supplementary material for: Spatial knowledge acquired from first-person and dynamic map perspectives
Source: Springer Nature journal article supplement (doi:10.1007/s00426-020-01389-y), 2020-08-09
Supplement: MOESM2 [file 18261056]

Supplemental table 2. Multiple regression diagnostics (First-person perspective)

| Regression analysis        | Normal distribution of residuals | homoscedasticity | Residual Independence | multicollinearity |       | Cook's Distance |
|----------------------------|----------------------------------|------------------|-----------------------|-------------------|-------|-----------------|
|                            | PP plot                          | scatterplot      | Durbin-Watson         | TOL               | VIF   | Maximum         |
| <b>Route Sequence</b>      | ✓                                | ✓                | 1.822                 | 0.989             | 1.011 | 0.57            |
| <b>Route Continuation</b>  | ✓                                | ✓                | 1.881                 | 0.974             | 1.027 | 0.96            |
| <b>Distance Estimation</b> | N.S.                             | N.S.             | N.S.                  | N.S.              | N.S.  | N.S.            |
| <b>Location on Map</b>     | ✓                                | ✓                | 1.807                 | 0.985             | 1.015 | 0.1             |
| <b>Point to Start</b>      | ✓                                | ✓                | 1.968                 | 0.953             | 1.049 | 0.157           |
| <b>Point to End</b>        | ✓                                | ✓                | 1.885                 | 0.899             | 1.112 | 0.062           |
