# Supplementary material for: Spatial knowledge acquired from first-person and dynamic map perspectives
Source: Springer Nature journal article supplement (doi:10.1007/s00426-020-01389-y), 2020-08-09
Supplement: MOESM3 [file 18261056]

Supplemental table 3. Multiple regression diagnostics (dynamic map perspective)

| Regression analysis | Normal distribution of residuals |             | homoscedasticity | Residual Independence |       | multicollinearity |  | Cook's Distance |
|---------------------|----------------------------------|-------------|------------------|-----------------------|-------|-------------------|--|-----------------|
|                     | PP plot                          | scatterplot | Durbin-Watson    | TOL                   | VIF   | Maximum           |  |                 |
| Route Sequence      | ✓                                | ✓           | 2.048            | 0.978                 | 1.022 | 0.181             |  |                 |
| Route Continuation  | ✓                                | ✓           | 1.1711           | 0.93                  | 1.075 | 0.238             |  |                 |
| Distance Estimation | ✓                                | ✓           | 2.107            | 1.00                  | 1.00  | 0.062             |  |                 |
| Location on Map     | ✓                                | ✓           | 2.181            | 1.00                  | 1.00  | 0.89              |  |                 |
| Point to Start      | ✓                                | ✓           | 2.069            | 1.00                  | 1.00  | 0.163             |  |                 |
| Point to End        | ✓                                | ✓           | 2.152            | 0.974                 | 1.027 | 0.088             |  |                 |
